# Supplementary material
Source: MDPI journal article supplement (https://www.mdpi.com/2076-3417/8/12/2655)
Supplement: s1 [file s1]

# Supplementary Materials: Gold Nanotriangles as Selective Catalysts for Cyclohexanol and Cyclohexanone Production

Inês A. S. Matias <sup>1</sup>, A. P. C. Ribeiro <sup>1</sup>, Rui P. Oliveira-Silva <sup>2</sup>, Duarte M. F. Prazeres <sup>2</sup> and Luísa M. D. R. S. Martins <sup>1,\*</sup>

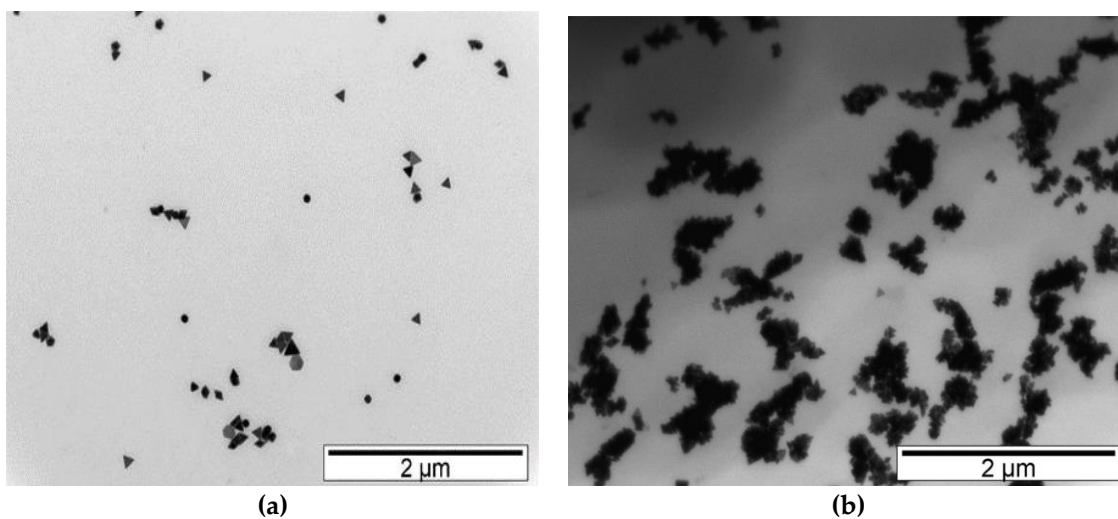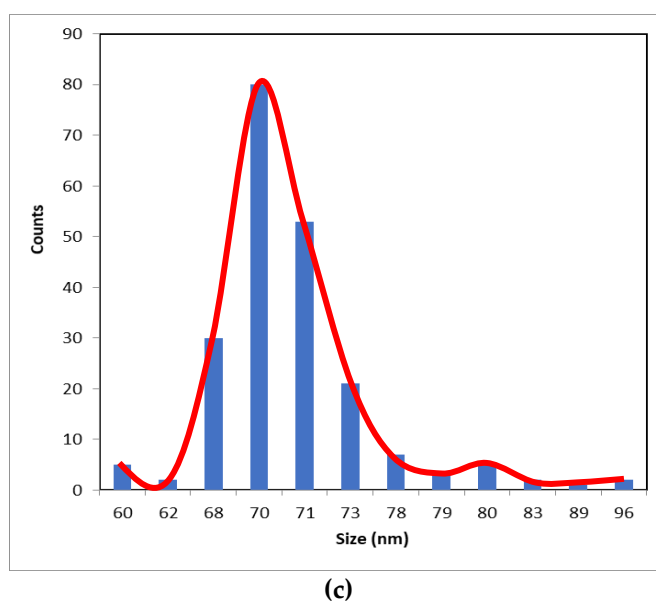

**Figure S1.** Additional Transmission Electron Microscopy (TEM) images (a) and (b) and histogram (c) of Au NTs.

Calculations for NTs surface and volume of an equilateral triangle were performed using equations S1 and S2:

$$A = \frac{s^2 \times \sqrt{3}}{4} \quad (\text{S1})$$

where  $s$  = length of a side.

$$V = A \times h \quad (\text{S2})$$

where h is the height of the triangular shape.

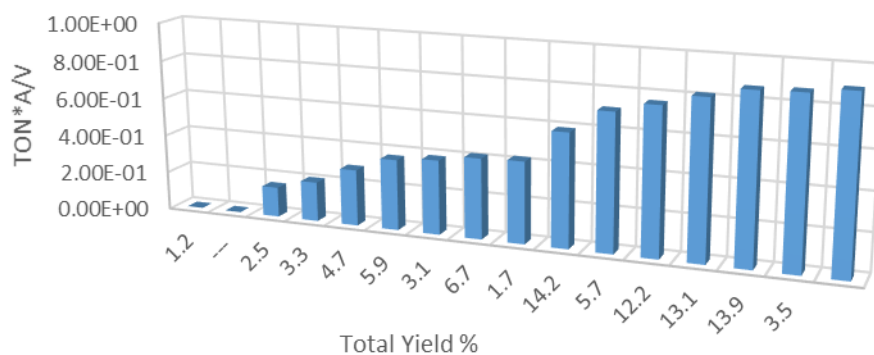

**Figure S2.** Dependence of turnover number (TON) affected by the surface to volume ratio, on the total yield of products.
